# Supplementary material
Source: PubMed Central journal article supplement (PMC2459276)

## SUPPLEMENTARY DATA

Fig. 1: **Inhibition of IKK does not effect TB2-T1 cell proliferation.** TB2-T1 cells were seeded in a 6-well plate (250,000 cells/well). The following day cells were rinsed twice with PBS and serum-starved overnight in DMEM. Serum-starved cells were treated with 50 ng/ml of SDF-1 $\alpha$  and 1  $\mu$ M of IKK $\beta$ VI inhibitor. The following day cells were counted (24 hr).

# Suppl. Figure 1

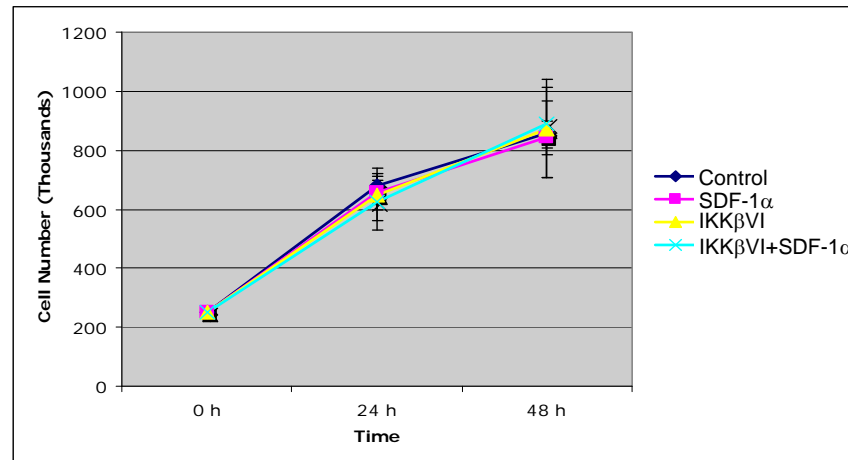

Supplement: M710432200_1.pdf [file M710432200_1.pdf]
